# Supplementary material for: A classical [V10O28]6− anion templated high-nuclearity silver thiolate cluster
Source: Royal Society of Chemistry journal article supplement (doi:10.1039/d2cc03003a), 2022-01-01
Supplement: d2cc03003a1.pdf [file d2cc03003a1.pdf]

## **Electronic Supplementary Information (ESI)**

**A classical  $[\text{V}_{10}\text{O}_{28}]^{6-}$  anion templated high-nuclearity silver  
thiolate cluster**

## Experimental details

The  $\{(\text{HNEt}_3)_2[\text{Ag}_{10}(\text{tBuPhS})_{12}]\}_n$  precursor and  $\text{H}_4\text{TC4A}$  ligand were synthesized according to the relevant literatures.<sup>1,2</sup> The chemicals and solvents used in the syntheses were of analytical grade without further purification. The IR spectra were recorded on the Bruker Tensor II spectrophotometer (Bruker Optics GmbH, Ettlingen, Germany) employing a single attenuated total reflectance (ATR) accessory with a wavenumber range of 4000-500  $\text{cm}^{-1}$ . The PXRD data were acquired by using a Rigaku Oxford Diffraction XtaLAB Synergy diffractometer with Cu radiation ( $\lambda = 1.54184 \text{ \AA}$ ). The Powder function of the *CrysAlis<sup>Pro</sup>* software suite<sup>3</sup> was used to process the PXRD patterns. UV-Vis diffuse reflectance spectrum was carried out on a Thermo Scientific Evolution 220 UV-visible spectrophotometer equipped with an 60 mm integrating sphere and SPECTRALON<sup>®</sup> was used as the reference. The optical band gap is determined based on the Kubelka-Munk function of  $(\alpha h\nu)^{1/2} = \kappa(h\nu - E_g)$  ( $E_g$  is the band gap (eV),  $h$  is the Planck's constant (J.s),  $\nu$  is the light frequency ( $\text{s}^{-1}$ ),  $\kappa$  is the absorption constant and  $\alpha$  is the absorption coefficient).<sup>4,5</sup> The ESI-MS was performed on a Bruker impact II high definition mass spectrometer, quadrupole and time-of-flight (Q/TOF) modules (end plate offset = -400 V; dry gas = 3  $\text{L min}^{-1}$ ; nebulizer = 0.3 bar; capillary voltage = 3500 V; sample flow rate = 180  $\mu\text{L h}^{-1}$ ). The data of ESI-MS was analyzed using Compass Data Analysis software (Version 4.4) based on the isotope distribution patterns. Photocurrent test and Mott-Schottky experiment were carried out on a CHI660E electrochemistry workstation. The crystals (3 mg) of **Ag50** and naphthol (0.5 wt.%, 10  $\mu\text{L}$ ) were dispersed in 0.3 mL ethanol, and then transferred by pipet to the cleaned ITO glass. The coated film used as working electrode was obtained after evaporation under ambient atmosphere. Differential scanning calorimetry and thermogravimetric analysis (DSC/TGA) measurement was performed with a TA SDT Q600 thermal analyzer at a scanning rate of 20  $^\circ\text{C}/\text{min}$  under  $\text{N}_2$ , from 20 to 800  $^\circ\text{C}$ .

## X-ray crystallography

Fresh crystal of **Ag50** with high quality was picked out under an optical microscope and quickly wrapped with high vacuum grease (Dow Corning Corporation) to prevent decomposition. The SCXRD data was recorded on a Rigaku Oxford Diffraction XtaLAB Synergy diffractometer equipped with Rigaku HyPix detector at 100 K. Using a Cu K $\alpha$  radiation ( $\lambda = 1.54184 \text{ \AA}$ ) from PhotonJet micro-focus X-ray sources to measure. The diffraction images of **Ag50** were processed and scaled using the *CrysAlis<sup>Pro</sup>* software.<sup>3</sup> Analytical numeric absorption correction was applied using a multifaceted crystal model based on expressions derived by R.C. Clark & J.S. Reid<sup>6</sup>. The structure was solved using SHELXT structure solution program<sup>7</sup> and refined by full-matrix least-squares techniques against  $F_o^2$  using the SHELXL program<sup>8</sup> through the OLEX2 interface.<sup>9</sup> Hydrogen atoms at carbon were placed in calculated positions and refined isotropically by using a riding model. Appropriate restraints or constraints were applied to the geometry and the atomic displacement parameters of the atoms in the cluster. All structures were examined using the Addsym subroutine of PLATON<sup>10</sup> to ensure that no additional symmetry could be applied to the models. Pertinent crystallographic data collection and refinement parameters are collated in Table S4. Selected bond lengths and angles are collated in Table S5.

A solvent mask was calculated and 652.2 electrons were found in a volume of 2510.8  $\text{\AA}^3$  void per formula unit. This is consistent with the presence of 4  $\text{CF}_3\text{COO}^-$  and 10 DMF per formula unit which account for 624 electrons per formula unit.

## Synthesis Details

The Ag<sub>50</sub> cluster was synthesized using the combination of room temperature stirring and solvothermal method. Specifically, a mixture of  $\{(\text{HNEt}_3)_2[\text{Ag}_{10}(\text{tBuPhS})_{12}]\}_n$  (13.7 mg, 0.05 mmol), H<sub>4</sub>TC4A (10.8 mg, 0.015 mmol) and Na<sub>3</sub>VO<sub>4</sub> (8 mg, 0.04 mmol) were immersed in 1 mL DMF and stirred magnetically for three hours at room temperature. Then, to the above mixture 0.5 mL DMF solution of CF<sub>3</sub>COOAg (22.1 mg, 0.1 mmol) was added. The reaction proceeded for another three hours. Then, the brown turbid solution is sealed into a 25 mL teflon-lined autoclave and kept at 65 °C for 2000 minutes. After cooling to room temperature, black rod-like crystals of **Ag50** were deposited on the bottom of the bottle with a yield of ~21.5%. Repeated experiments were carried out in multiple batches under the same synthesis conditions, which confirmed the excellent reproducibility of the **Ag50** sample. After removing the H<sub>4</sub>TC4A ligand from the synthesis procedure, the yield was less than 1%. Selected IR peaks (cm<sup>-1</sup>): 2957 (m), 1647 (s), 1488 (m), 1395 (w), 1362 (w), 1275 (w), 1192 (s), 1149 (m), 1000 (m), 918 (m), 820 (m), 721 (s), 546 (s).

**Figure S1:** The crystal packing diagrams of **Ag50** in a unit cell viewed along  $a(a)$ ,  $b(b)$  and  $c(c)$  axis. Color code: purple, Ag; red, O; yellow, S; gray, C; green, F; blue, V; orange, N. The blue polyhedra represent  $[V_{10}O_{28}]^{6-}$  template.

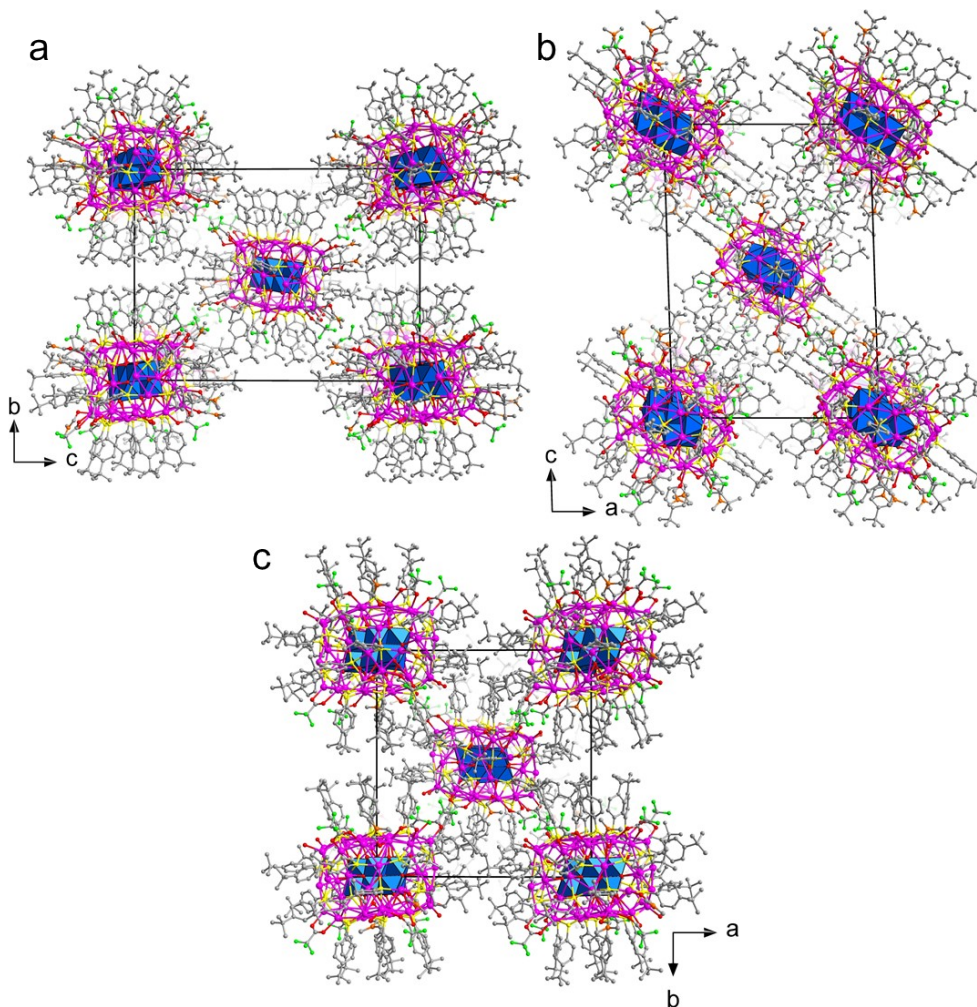

**Figure S2:** DSC/TGA curves of **Ag50** (heating rate 20 °C min<sup>-1</sup>).

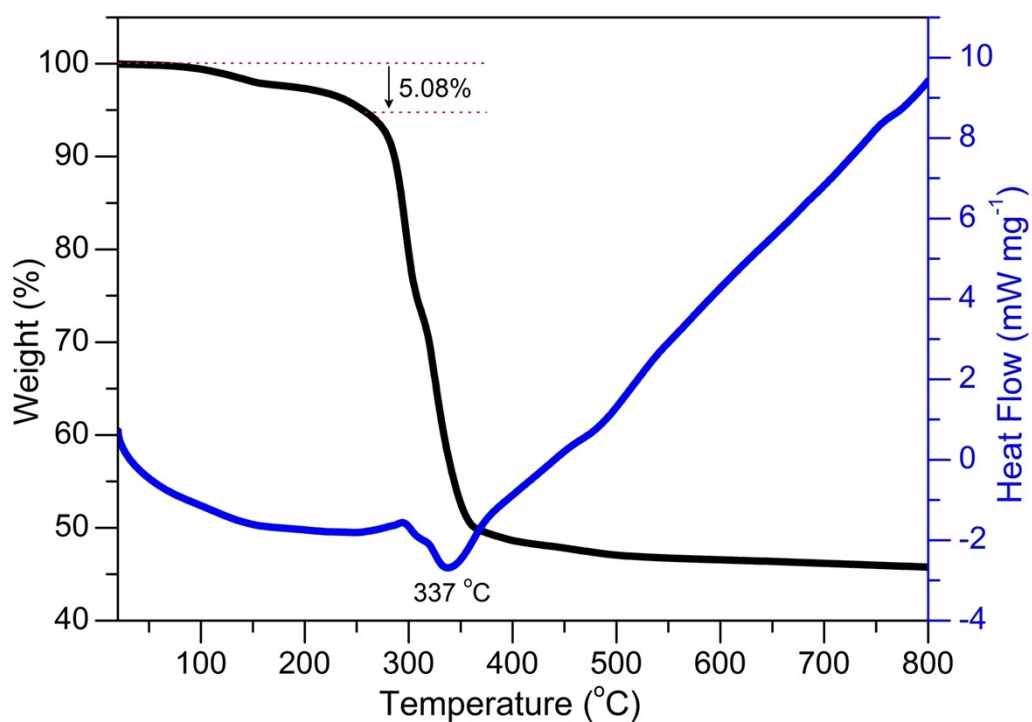

The TGA of the **Ag50** showed that a slight weight loss of 5.08% was found in the temperature range of 20-256 °C, which could be assigned to the loss of ten DMF molecules (calcd. 5.07%). The subsequent second major weight loss could be attributed to the decomposition of **Ag50** (256-367 °C), which is consistent with the endothermic peak of DSC curve at 337 °C.

**Figure S3:** (a) and (b) The  $[\text{V}_{10}\text{O}_{28}]^{6-}$  template caged in box-like  $\text{Ag}_{50}$  shell viewed along two different directions. The inner polyhedra represent  $[\text{V}_{10}\text{O}_{28}]^{6-}$  template.

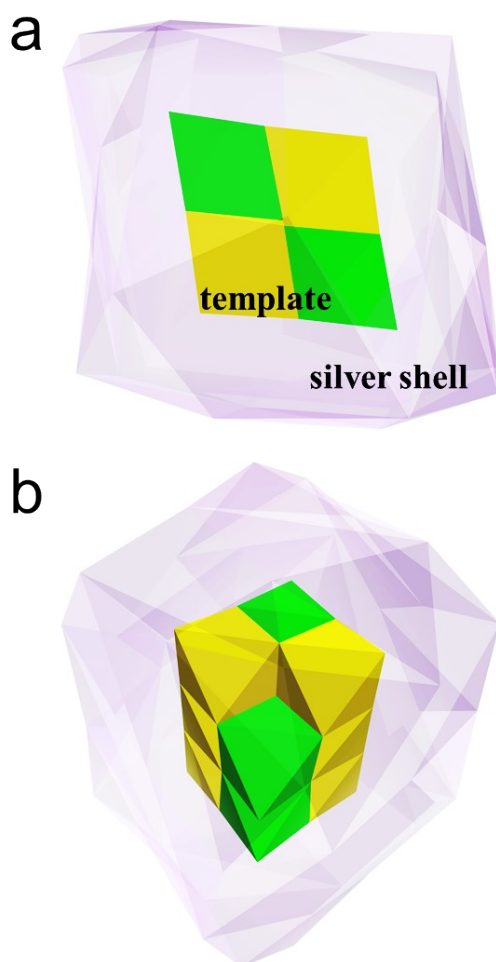

**Figure S4:** (a) and (b) One 2-fold axis passing through two silver atoms (cyan balls) of the  $\text{Ag}_{50}$  shell and four oxygen atoms (black balls) within the  $[\text{V}_{10}\text{O}_{28}]^{6-}$  anion, viewed along two orthogonal directions. Color code: purple and cyan, Ag; red and black, O; yellow, S; gray, C; green, F; blue, V; orange, N.

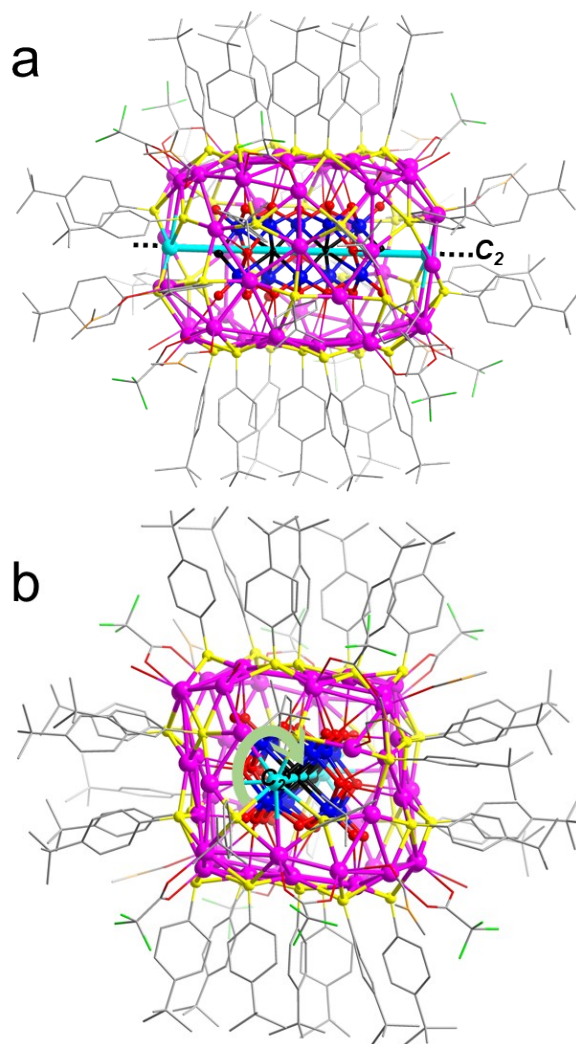



**Figure S5:** (a) and (b) The coordination modes of  $[\text{V}_{10}\text{O}_{28}]^{6-}$  anion towards 24 silver atoms viewed along two orthogonal directions. Color code: purple, Ag; red, O; blue, V.

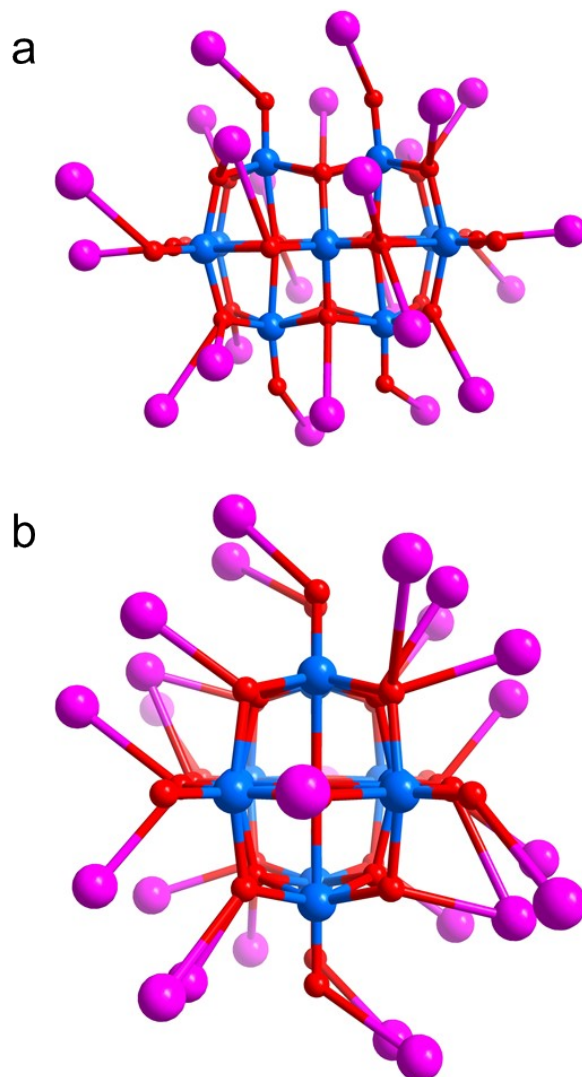

**Figure S6:** The arrangements of  $t\text{BuPhS}^-$  ligands on the surface of  $\text{Ag}_{50}$  shell. Color code: purple, Ag; yellow, S; gray, C.

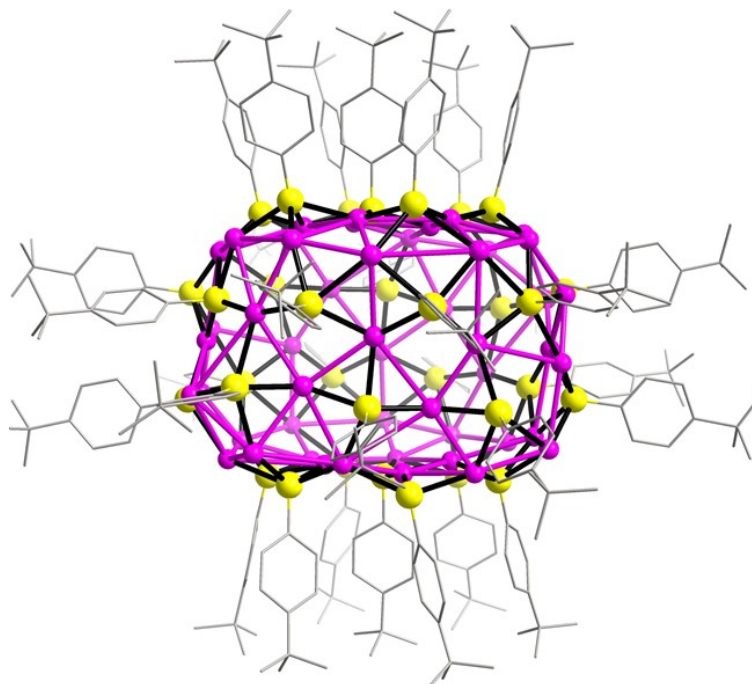

**Figure S7:** (a) and (b) Four-layered distribution of  $t\text{BuPhS}^-$  ligands marked in different colors viewed along two orthogonal directions. The  $t\text{BuPhS}^-$  ligand layers distributed from box cover to box body to opposite box cover are shown in pink, blue, yellow and green atoms, respectively.

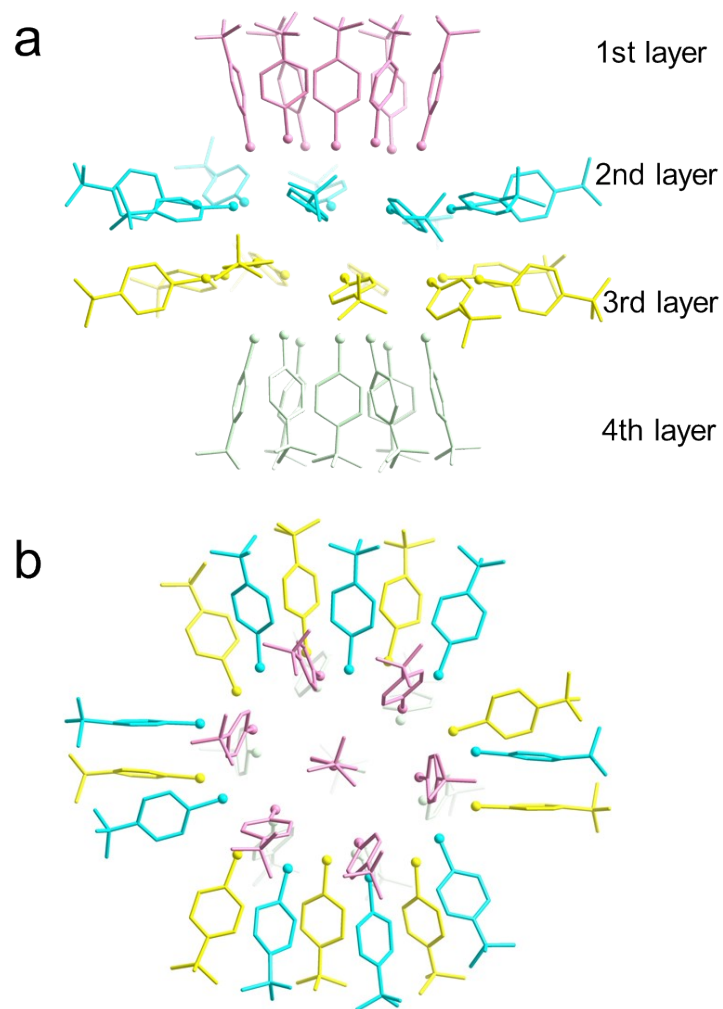

**Figure S8:** The arrangements of  $\text{CF}_3\text{COO}^-$  ligands on the surface of  $\text{Ag}_{50}$  shell. Color code: purple, Ag; red, O; gray, C; green, F.

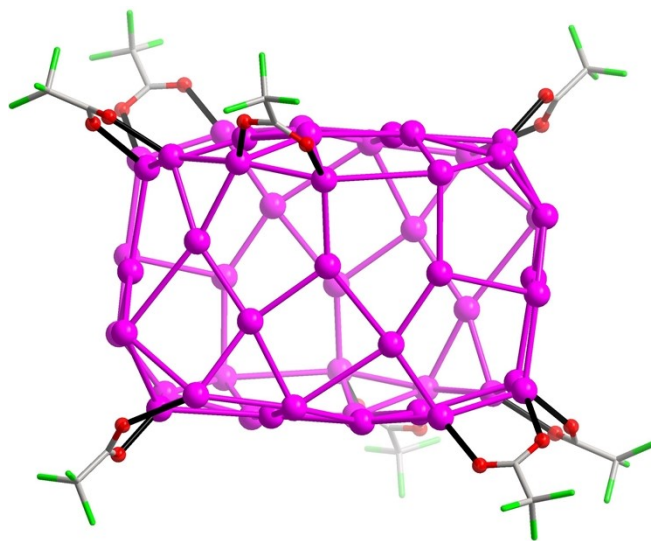

**Figure S9:** The picture of the crystal (Ag<sub>50</sub>) used for SCXRD analysis.

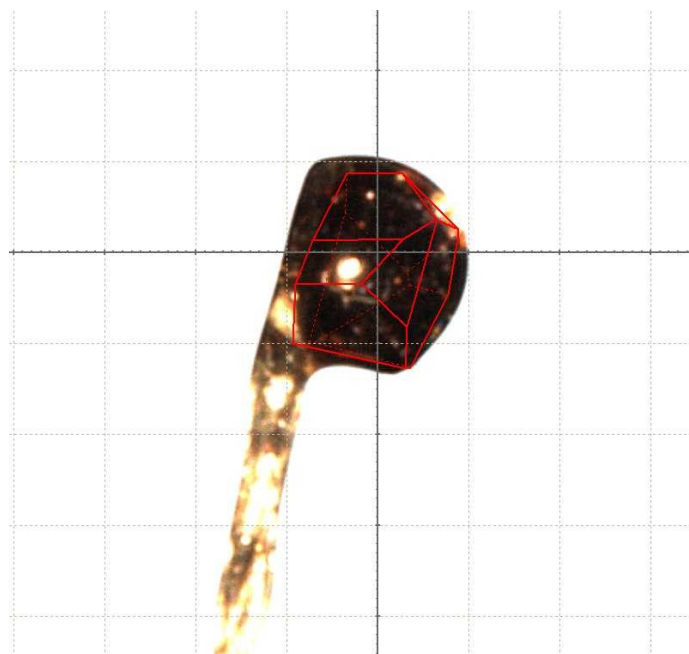

**Figure S10:** The surface of **Ag50** calculated via 3V Volume Assessor program<sup>11</sup> by rolling a virtual probe (5.0 Å) on the surface viewed along six different orientations.

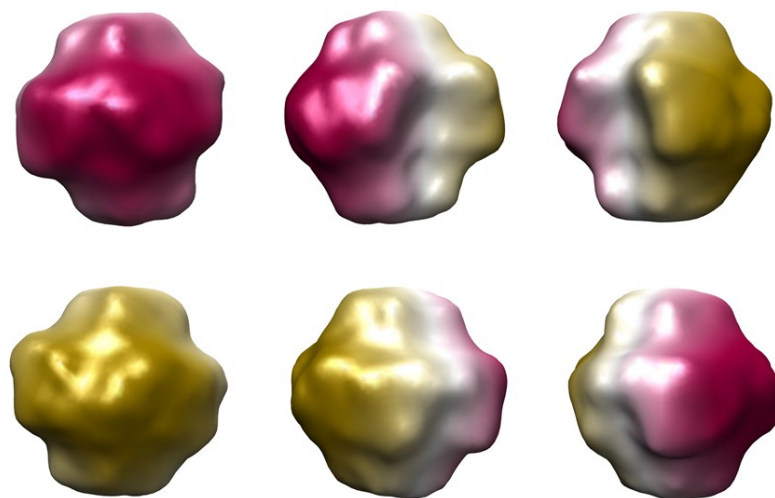

**Figure S11:** The photograph of the fresh crystals of **Ag50** under an optical microscope.

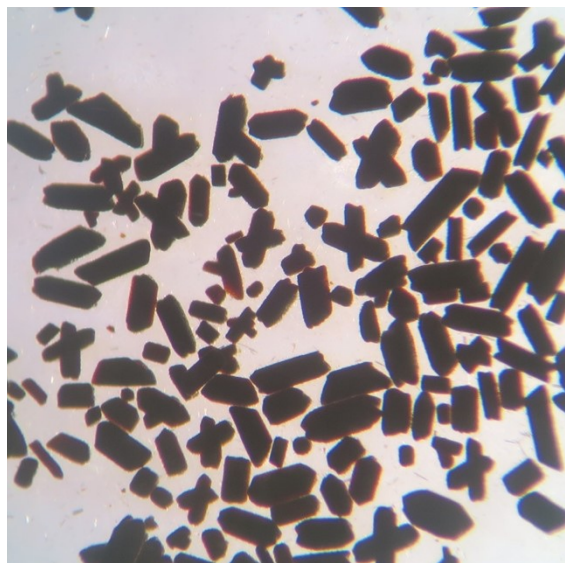

**Table S1:** The summary of polyoxymolybdate-, polyoxytungstate- and polyoxovanadate-templated silver clusters.

| Formula                                                                                                                    | Structure                                                                            | Ref. |
|----------------------------------------------------------------------------------------------------------------------------|--------------------------------------------------------------------------------------|------|
| $\alpha\text{-Mo}_5\text{O}_{18}@Ag_{38}(\text{tBuS})_{18}(\text{PhCOO})_{14}\cdot 2\text{CH}_2\text{Cl}_2$                | 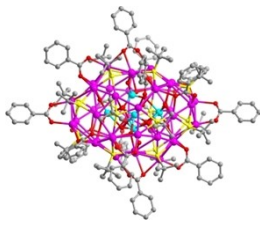   | 12   |
| $\text{Mo}_6\text{O}_{22}@Ag_{44}(\text{tPrS})_{20}(\text{PhCOO})_{16}(\text{CH}_3\text{CN})_2\cdot 2\text{CH}_3\text{CN}$ |    | 13   |
| $\text{Mo}_8\text{O}_{28}@Ag_{50}(\text{tPrS})_{24}(\text{PhCOO})_{18}(\text{CH}_3\text{CN})_2\cdot 4\text{CH}_3\text{CN}$ |   | 14   |
| $\text{Mo}_6\text{O}_{22}@Ag_{46}(\text{tBuPhS})_{32}(\text{dppm})_4(\text{CH}_3\text{CN})_8\cdot 6\text{CF}_3\text{SO}_3$ |  | 14   |
| $\text{Mo}_6\text{O}_{22}@Ag_{58}\text{S}_2(\text{tBuPhS})_{36}(\text{CF}_3\text{COO})_{10}(\text{H}_2\text{O})_8$         |  | 15   |
| $(\text{Mo}_6\text{O}_{22})_2@Ag_{60}(\text{tBuC}\equiv\text{C})_{38}(\text{CF}_3\text{SO}_3)_4$                           |  | 16   |



|                                                                                                                                                                                    |                                                                                      |    |
|------------------------------------------------------------------------------------------------------------------------------------------------------------------------------------|--------------------------------------------------------------------------------------|----|
| $(\text{Mo}_6\text{O}_{22})_2@ \text{Ag}_{76}(\text{MeOPhS})_{28}(\text{dppm})_8(\text{MoO}_4)_{16}(\text{H}_2\text{O})_8 \cdot 8\text{CH}_3\text{OH} \cdot 4\text{CH}_3\text{CN}$ | 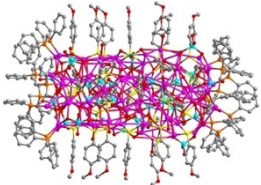   | 17 |
| $\text{Mo}_7\text{O}_{24}@ \text{Ag}_{41}(\text{PrS})_{19}(\text{Tos})_{16}(\text{CH}_3\text{OH})_4 \cdot 4\text{CH}_3\text{OH}$                                                   |    | 18 |
| $(\text{Bu}_4\text{N})_{1.5}[\text{Mo}_5\text{O}_{18}@ \text{Ag}_{36}(\text{PrS})_{18}(\text{Tos})_{13.5}(\text{CH}_3\text{CN})] \cdot 1.5\text{CH}_3\text{CN}$                    |    |    |
| $\text{Mo}_8\text{O}_{28}@ \text{Ag}_{48}(p\text{-MePhS})_{24}(\text{CF}_3\text{COO})_{14}(\text{H}_2\text{O})_4(\text{DMF})_2 \cdot 2\text{CF}_3\text{COO}$                       |   | 19 |
| $\alpha\text{-Mo}_5\text{O}_{18}@ \text{Ag}_{36}(\text{PrS})_{18}(\text{PhSO}_3)_{12}(\text{DMF})_6$                                                                               |  | 20 |
| $\{(\text{Bu}_4\text{NH})[\beta\text{-Mo}_5\text{O}_{18}@ \text{Ag}_{36}(\text{BuS})_{18}(\text{PhSO}_3)_{13}(\text{CH}_3\text{OH})]\}_n$                                          |  |    |

|                                                                                                                                                                                                                                |                                                                                      |    |
|--------------------------------------------------------------------------------------------------------------------------------------------------------------------------------------------------------------------------------|--------------------------------------------------------------------------------------|----|
| $[\text{Mo}_2\text{O}_8@_{\text{Ag}_{30}}(\text{tBuS})_{15}(\text{PhSO}_3)_{11}(\text{CH}_3\text{OH})_2(\text{H}_2\text{O})\cdot\text{H}_2\text{O}]_2$                                                                         | 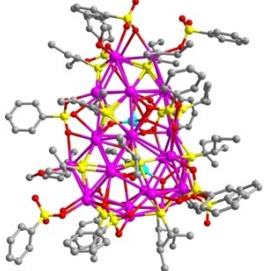   |    |
| $[\text{Mo}_4\text{O}_{14}(\text{SO}_4)]_2@_{\text{Ag}_{73}}\text{S}_4(\text{PhSO}_3)_{17}(\text{tBuS})_{30}(\text{SO}_4)_3(\text{H}_2\text{O})_4\cdot 2\text{H}_2\text{O}$                                                    |    |    |
| $\text{Ag}_{10}@(\text{Mo}_7\text{O}_{26})_2@_{\text{Ag}_{70}}(\text{MoO}_4)_2(\text{CyS})_{36}(\text{CF}_3\text{SO}_3)_{16}(\text{DMF})_6\cdot 2\text{DMF}\cdot 4^n\text{PrOH}$                                               |    | 21 |
| $\text{Ag}_{10}@(\text{Mo}_7\text{O}_{26})_2@_{\text{Ag}_{70}}(\text{MoO}_4)_2(\text{tPrS})_{36}(\text{CF}_3\text{SO}_3)_{16}(\text{DMF})_6$                                                                                   |   |    |
| $\text{Mo}_{20}\text{O}_{66}@_{\text{Ag}_{62}}(\text{tBuS})_{40}(\text{Mo}_6\text{O}_{19})_3(\text{CH}_3\text{CN})_2\cdot 4\text{CF}_3\text{SO}_3$                                                                             |  | 22 |
| $\text{Mn}^{\text{III}}\text{Mn}^{\text{IV}}_2\text{Mo}_{14}\text{O}_{56}@_{\text{Ag}_{64}}(\text{tBuC}\equiv\text{C})_{38}(\text{CF}_3\text{COO})_8(\text{OH})\cdot 10\text{C}_6\text{H}_5\text{CN}\cdot 2\text{H}_2\text{O}$ |  | 23 |
| $\text{Mo}_6\text{O}_{22}@_{\text{Ag}_{40}}(\text{tBuC}\equiv\text{C})_{20}(\text{CF}_3\text{COO})_{12}(\text{CH}_3\text{OH})_2$                                                                                               |  | 24 |

|                                                                                                                                                                                                      |                                                                                      |    |
|------------------------------------------------------------------------------------------------------------------------------------------------------------------------------------------------------|--------------------------------------------------------------------------------------|----|
| $[\text{Mo}_6\text{O}_{19}@_{\text{Ag}}44(\text{EtS})_{24}(\text{SCl}_4)_3]_n$                                                                                                                       | 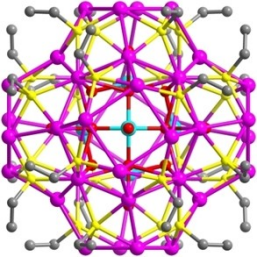   | 25 |
| $\text{Cu}_3\text{Mo}_8\text{O}_{32}@_{\text{Ag}}55(\text{CyS})_{43}(\text{CH}_3\text{O})(\text{CF}_3\text{COO})\cdot 3\text{H}_2\text{O}$                                                           |    | 26 |
| $\text{K}(\text{H}_2\text{O})\text{HP}_5\text{W}_{30}\text{O}_{110}@_{\text{Ag}}43(^t\text{BuC}\equiv\text{C})_{29}(\text{CN})(\text{CH}_3\text{CN})(\text{H}_2\text{O})\cdot 4\text{CH}_3\text{CN}$ |   | 27 |
| $(\text{PW}_9\text{O}_{34})_2@_{\text{Ag}}67(p\text{-FPhS})_{36}(\text{DMAc})_2(\text{CF}_3\text{COO})_6\cdot 7\text{CF}_3\text{COO}\cdot x\text{DMAc}$                                              |  | 28 |
| $(\text{PW}_9\text{O}_{34})_2@_{\text{Ag}}70(^t\text{BuC}\equiv\text{C})_{44}(\text{H}_2\text{O})_2\cdot 8\text{BF}_4\cdot 2(\text{BMIm})\text{BF}_4\cdot 3\text{H}_2\text{O}$                       |  | 29 |
| $(\text{SO}_4)_2(\text{W}_5\text{O}_{19})_2@_{\text{Ag}}90(^t\text{BuPhS})_{44}(\text{PhCOO})_{24}(\text{DMF})_2(\text{H}_2\text{O})_2\cdot 2\text{PhCOO}$                                           |  | 30 |
| $\text{W}_6\text{O}_{21}@_{\text{Ag}}34(^t\text{BuS})_{26}(\text{CF}_3\text{COO})\cdot \text{CF}_3\text{COO}\cdot \text{Et}_3\text{N}\cdot 20\text{CH}_3\text{OH}$                                   |  | 31 |

|                                                                                                                                                                                                                                       |                                                                                      |    |
|---------------------------------------------------------------------------------------------------------------------------------------------------------------------------------------------------------------------------------------|--------------------------------------------------------------------------------------|----|
| $\text{Ag}_{10}@\text{(W}_7\text{O}_{26})_2@\text{Ag}_{74}\text{S}_2(\text{tPrS})_{40}(\text{PrCOO})_{18}\cdot 2\text{CH}_3\text{OH}$                                                                                                 | 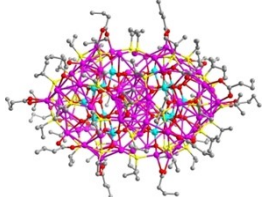   | 32 |
| $\text{Ag}_{10}@\text{(W}_7\text{O}_{26})_2@\text{Ag}_{74}\text{S}_2(\text{tPrS})_{40}(\text{PhCOO})_{18}$                                                                                                                            |    |    |
| $\text{Ho}(\text{W}_5\text{O}_{18})_2@\text{Ag}_{42}(\text{tBuC}\equiv\text{C})_{28}\text{Cl}_4\cdot \text{OH}$                                                                                                                       |    | 33 |
| $\text{Eu}(\text{W}_5\text{O}_{18})_2@\text{Ag}_{42}(\text{tBuC}\equiv\text{C})_{28}\text{Cl}_4\cdot \text{OH}\cdot \text{H}_2\text{O}$                                                                                               |    | 34 |
| $(\text{EuW}_{10}\text{O}_{36})_2@\text{Ag}_{72}(\text{tBuC}\equiv\text{C})_{48}\text{Cl}_2\cdot 4\text{BF}_4$                                                                                                                        |   | 35 |
| $\alpha\text{-SiW}_{10}\text{O}_{37}@\text{Ag}_{41}(\text{tBuC}\equiv\text{C})_{27}(\text{CH}_3\text{CN})_3\cdot \beta\text{-SiW}_{12}\text{O}_{40}\cdot \text{H}_2\text{O}\cdot 4\text{CH}_3\text{CN}$                               |  | 36 |
| $\text{SiW}_9\text{O}_{34}@\text{Ag}_{34}\text{Cu}_6(\text{tBuC}\equiv\text{C})_{18}(\text{tBuPO}_3)_9(\text{CH}_3\text{CN})_2(\text{H}_2\text{O})\cdot 2\text{C}_6\text{H}_5\text{CN}$                                               |  | 37 |
| $\text{SiW}_9\text{O}_{34}@\text{Ag}_{37}\text{Cu}_6(\text{tBuC}\equiv\text{C})_{18}(\text{tBuPO}_3)_9(\text{CH}_3\text{CN})_6\cdot 0.5\text{SiW}_{12}\text{O}_{40}\cdot \text{OH}$                                                   |  |    |
| $(\text{WO}_6)(\text{SiW}_9\text{O}_{34})@\text{Ag}_{51}(\text{tBuC}\equiv\text{C})_{27}(\text{tBuPO}_3)_3(\text{CH}_3\text{COO})_3(\text{C}_6\text{H}_5\text{CN})_3\cdot 0.5\text{H}_8\text{SiW}_{12}\text{O}_{40}\cdot \text{BF}_4$ |  |    |

|                                                                                                                                                                                             |                                                                                      |    |
|---------------------------------------------------------------------------------------------------------------------------------------------------------------------------------------------|--------------------------------------------------------------------------------------|----|
| $\text{W}_{10}\text{O}_{32}@Ag_{44}(\text{tBuS})_{24}(\text{CF}_3\text{COO})_8(\text{CF}_3\text{COO})_6 \cdot 6\text{H}_2\text{O}$                                                          | 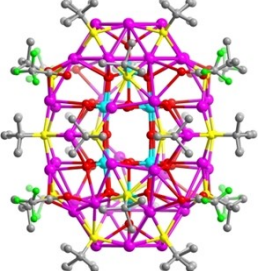   | 38 |
| $(\text{CO}_3)(\text{CoW}_{12}\text{O}_{40})_2@Ag_{42}(\text{tBuC}\equiv\text{C})_{27}(\text{CH}_3\text{CN})_2$                                                                             |    | 39 |
| $\text{PW}_9\text{O}_{34}@Ag_{51}(\text{iPrS})_{25}(\text{CF}_3\text{COO})_{17}(\text{DMF})_3(\text{CH}_3\text{OH})_3$                                                                      |    | 40 |
| $\{[(\text{PW}_9\text{O}_{34})_2@Ag_{72}\text{S}(\text{iPrS})_{41}(\text{CF}_3\text{COO})_8(\text{bipy})_{5,5}(\text{CH}_3\text{OH})(\text{H}_2\text{O})] \cdot 3\text{CF}_3\text{COO}\}_n$ |   |    |
| $\{[(\text{PW}_9\text{O}_{34})_2@Ag_{72}\text{S}(\text{iPrS})_{42}(\text{CF}_3\text{COO})_7(\text{pi-bipy})_{4,5}(\text{CH}_3\text{OH})] \cdot 3\text{CF}_3\text{COO}\}_n$                  |                                                                                      |    |
| $(\text{P}_2\text{W}_{15}\text{Nb}_3\text{O}_{62})@Ag_{25}(\text{tBuC}\equiv\text{C})_{16}(\text{CH}_3\text{CN})_4$                                                                         |  | 41 |
| $(\text{tBu}_4\text{N})[\text{Ag}_{42}(\text{CO}_3)(\text{SiW}_9\text{Nb}_3\text{O}_{40})_2@(\text{tBuC}\equiv\text{C})_{27}] \cdot 5\text{CH}_3\text{CN}$                                  |  | 42 |

|                                                                                                                                                                                                           |                                                                                      |    |
|-----------------------------------------------------------------------------------------------------------------------------------------------------------------------------------------------------------|--------------------------------------------------------------------------------------|----|
| $[(Et)_4N]_3 \{ [(O_2)V_2O_6]_2 @ Ag_{36} (tBuC \equiv C)_{12} [(tBuPO_3)_4 V_4O_8]_2 (tBuPO_3)_2 (NO_3)_7 (2-CIPy)(DMF) \}$                                                                              | 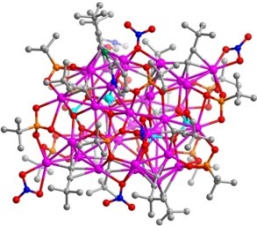   | 43 |
| $[(Et)_4N]_2 \{ [(O_2)V_2O_6]_2 Cl @ Ag_{36} (tBuC \equiv C)_{11} [(tBuPO_3)_4 V_4O_8]_2 [(tBuPO_3)_2 (VO_2)] (tBuPO_3)_2 (tBuPO_3H)(DMF)(NO_3)_2 (Et_2O)(H_2O)_3 \} \cdot 2DMF \cdot 2Et_2O \cdot 4H_2O$ |    |    |
| $\{ [(O_2)V_2O_6]_3 @ Ag_{43} (PhC \equiv C)_{19} [(tBuPO_3)_4 V_4O_8]_3 (DMF)_6 \} \cdot 5DMF \cdot 2H_2O$                                                                                               |    | 44 |
| $[V_{10}O_{28} @ Ag_{44} (EtS)_{20} (PhSO_3)_{18} (H_2O)_2]_n$                                                                                                                                            |   | 25 |
| $[V_{10}O_{28} @ Ag_{46} (EtS)_{23} (PhSO_3)_{15} (CO_3)]_n$                                                                                                                                              |  |    |
| $V^V_{10} V^{IV}_2 O_{34} @ Ag_{30} (tBuS)_{20} \cdot 10CH_3OH$                                                                                                                                           |  | 45 |
| $V^V_{10} V^{IV}_2 O_{34} @ Ag_{30} (tBuS)_{20} \cdot 8CH_3OH$                                                                                                                                            |                                                                                      |    |
| $V^V_{10} V^{IV}_2 O_{34} @ Ag_{30} (tBuS)_{20} \cdot 7CH_3OH$                                                                                                                                            |  |    |

|                                                                                                                                                                                                                                                                                                                                                                                                                                                                  |                                                                                      |    |
|------------------------------------------------------------------------------------------------------------------------------------------------------------------------------------------------------------------------------------------------------------------------------------------------------------------------------------------------------------------------------------------------------------------------------------------------------------------|--------------------------------------------------------------------------------------|----|
| $V_{10}O_{28}@Ag_{40}(^tBuC\equiv C)_{22}(CF_3COO)_{12}\cdot 4CH_3OH$                                                                                                                                                                                                                                                                                                                                                                                            | 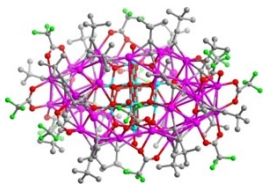   | 24 |
| $V_2O_7@Ag_{24}(^tBuC\equiv C)_{14}(CF_3COO)_6\cdot 2CH_3OH$                                                                                                                                                                                                                                                                                                                                                                                                     |    |    |
| $[Bz(Et)_3N]_8[(Et)_4N]_2[(V_2O_7)_2@Ag_{44}(^tBuC\equiv C)_{14}@(V_{32}O_{96})]$                                                                                                                                                                                                                                                                                                                                                                                |    | 46 |
| $V_2O_7@Ag_{24}(^tBuC\equiv C)_{14}(hfac)_6$                                                                                                                                                                                                                                                                                                                                                                                                                     |   | 47 |
| $V_2O_7@Ag_{40}(^tBuC\equiv C)_{22}(^tBuPO_3)_4(hfac)_4(CF_3COO)_2(H_2O)_2$                                                                                                                                                                                                                                                                                                                                                                                      |  |    |
| <p>Note: dppm = bis-(diphenylphosphino)methane; DMF = N,N-dimethylformamide; DMAc = N,N-dimethylacetamide; hfac = hexafluoroacetylacetonate; Cy = cyclohexyl; <sup>i</sup>Pr = iso-propyl; <sup>n</sup>Pr = normal-propyl; <sup>t</sup>Bu = tert-butyl; <sup>i</sup>Bu = iso-butyl; Tos = <i>p</i>-toluenesulfonate; bipy = 4,4'-bipyridine; pi-bipy = 1,4-bis(4-pyridinylmethyl)piperazine; BMIm = 1-butyl-3-methylimidazolium; Bz = benzyl; py = pyridine.</p> |                                                                                      |    |

**Table S2:** BVS calculations for the V atoms of **Ag50**.

| Atom | V <sup>III</sup> | V <sup>IV</sup> | V <sup>V</sup> |
|------|------------------|-----------------|----------------|
| V1   | 4.421            | 4.808           | <u>5.061</u>   |
| V2   | 4.320            | 4.697           | <u>4.945</u>   |
| V3   | 4.389            | 4.772           | <u>5.024</u>   |
| V4   | 4.316            | 4.694           | <u>4.941</u>   |
| V5   | 4.338            | 4.717           | <u>4.965</u>   |

The underlined value is the one closest to the charge for which it was calculated. The oxidation state can be taken as the integer nearest to the underlined value.



**Table S3:** The formulae of the key species detected in positive-ion mode ESI-MS of **Ag50** dissolved in MeOH-CH<sub>2</sub>Cl<sub>2</sub>.

| Peak      | Species                                                                                                                                                                    | Exp. <i>m/z</i> | Sim. <i>m/z</i> |
|-----------|----------------------------------------------------------------------------------------------------------------------------------------------------------------------------|-----------------|-----------------|
| <b>1a</b> | [V <sub>10</sub> O <sub>28</sub> @Ag <sub>46</sub> ( <sup>t</sup> BuPhS) <sub>27</sub> (CF <sub>3</sub> COO) <sub>9</sub> (H <sub>2</sub> O) <sub>2</sub> ] <sup>4+</sup>  | 2858.254        | 2858.202        |
| <b>1b</b> | [V <sub>10</sub> O <sub>28</sub> @Ag <sub>46</sub> ( <sup>t</sup> BuPhS) <sub>28</sub> (CF <sub>3</sub> COO) <sub>8</sub> (H <sub>2</sub> O) <sub>2</sub> ] <sup>4+</sup>  | 2871.774        | 2871.724        |
| <b>1c</b> | [V <sub>10</sub> O <sub>28</sub> @Ag <sub>46</sub> ( <sup>t</sup> BuPhS) <sub>29</sub> (CF <sub>3</sub> COO) <sub>7</sub> (H <sub>2</sub> O) <sub>2</sub> ] <sup>4+</sup>  | 2884.788        | 2884.746        |
| <b>1d</b> | [V <sub>10</sub> O <sub>28</sub> @Ag <sub>46</sub> ( <sup>t</sup> BuPhS) <sub>30</sub> (CF <sub>3</sub> COO) <sub>6</sub> (H <sub>2</sub> O) <sub>2</sub> ] <sup>4+</sup>  | 2898.249        | 2898.268        |
| <b>1e</b> | [V <sub>10</sub> O <sub>28</sub> @Ag <sub>47</sub> ( <sup>t</sup> BuPhS) <sub>28</sub> (CF <sub>3</sub> COO) <sub>9</sub> (H <sub>2</sub> O) <sub>2</sub> ] <sup>4+</sup>  | 2926.994        | 2926.947        |
| <b>1f</b> | [V <sub>10</sub> O <sub>28</sub> @Ag <sub>47</sub> ( <sup>t</sup> BuPhS) <sub>29</sub> (CF <sub>3</sub> COO) <sub>8</sub> (H <sub>2</sub> O) <sub>2</sub> ] <sup>4+</sup>  | 2939.515        | 2939.469        |
| <b>1g</b> | [V <sub>10</sub> O <sub>28</sub> @Ag <sub>47</sub> ( <sup>t</sup> BuPhS) <sub>30</sub> (CF <sub>3</sub> COO) <sub>7</sub> (H <sub>2</sub> O) <sub>2</sub> ] <sup>4+</sup>  | 2953.261        | 2953.241        |
| <b>1h</b> | [V <sub>10</sub> O <sub>28</sub> @Ag <sub>47</sub> ( <sup>t</sup> BuPhS) <sub>31</sub> (CF <sub>3</sub> COO) <sub>6</sub> (H <sub>2</sub> O) <sub>2</sub> ] <sup>4+</sup>  | 2966.234        | 2966.263        |
| <b>1i</b> | [V <sub>10</sub> O <sub>28</sub> @Ag <sub>48</sub> ( <sup>t</sup> BuPhS) <sub>28</sub> (CF <sub>3</sub> COO) <sub>10</sub> (H <sub>2</sub> O) <sub>2</sub> ] <sup>4+</sup> | 2982.219        | 2982.169        |
| <b>1j</b> | [V <sub>10</sub> O <sub>28</sub> @Ag <sub>48</sub> ( <sup>t</sup> BuPhS) <sub>29</sub> (CF <sub>3</sub> COO) <sub>9</sub> (H <sub>2</sub> O) <sub>2</sub> ] <sup>4+</sup>  | 2995.233        | 2995.191        |
| <b>1k</b> | [V <sub>10</sub> O <sub>28</sub> @Ag <sub>48</sub> ( <sup>t</sup> BuPhS) <sub>30</sub> (CF <sub>3</sub> COO) <sub>8</sub> (H <sub>2</sub> O) <sub>2</sub> ] <sup>4+</sup>  | 3008.499        | 3008.463        |
| <b>1l</b> | [V <sub>10</sub> O <sub>28</sub> @Ag <sub>48</sub> ( <sup>t</sup> BuPhS) <sub>31</sub> (CF <sub>3</sub> COO) <sub>7</sub> (H <sub>2</sub> O) <sub>2</sub> ] <sup>4+</sup>  | 3021.722        | 3021.736        |
| <b>1m</b> | [V <sub>10</sub> O <sub>28</sub> @Ag <sub>49</sub> ( <sup>t</sup> BuPhS) <sub>29</sub> (CF <sub>3</sub> COO) <sub>10</sub> (H <sub>2</sub> O) <sub>2</sub> ] <sup>4+</sup> | 3050.702        | 3050.664        |
| <b>1n</b> | [V <sub>10</sub> O <sub>28</sub> @Ag <sub>49</sub> ( <sup>t</sup> BuPhS) <sub>30</sub> (CF <sub>3</sub> COO) <sub>9</sub> (H <sub>2</sub> O) <sub>2</sub> ] <sup>4+</sup>  | 3063.471        | 3063.436        |
| <b>1o</b> | [V <sub>10</sub> O <sub>28</sub> @Ag <sub>49</sub> ( <sup>t</sup> BuPhS) <sub>31</sub> (CF <sub>3</sub> COO) <sub>8</sub> (H <sub>2</sub> O) <sub>2</sub> ] <sup>4+</sup>  | 3076.481        | 3076.458        |
| <b>1p</b> | [V <sub>10</sub> O <sub>28</sub> @Ag <sub>50</sub> ( <sup>t</sup> BuPhS) <sub>29</sub> (CF <sub>3</sub> COO) <sub>11</sub> (H <sub>2</sub> O) <sub>2</sub> ] <sup>4+</sup> | 3105.184        | 3105.136        |
| <b>1q</b> | [V <sub>10</sub> O <sub>28</sub> @Ag <sub>50</sub> ( <sup>t</sup> BuPhS) <sub>30</sub> (CF <sub>3</sub> COO) <sub>10</sub> (H <sub>2</sub> O) <sub>2</sub> ] <sup>4+</sup> | 3118.692        | 3118.659        |
| <b>1r</b> | [V <sub>10</sub> O <sub>28</sub> @Ag <sub>50</sub> ( <sup>t</sup> BuPhS) <sub>31</sub> (CF <sub>3</sub> COO) <sub>9</sub> (H <sub>2</sub> O) <sub>2</sub> ] <sup>4+</sup>  | 3131.958        | 3131.931        |

**Table S4:** Crystal data and structure refinements for **Ag50**.

|                                             |                                                       |
|---------------------------------------------|-------------------------------------------------------|
| Compound                                    | <b>Ag50</b>                                           |
| Empirical formula                           | $C_{398}H_{542}Ag_{50}F_{36}N_{18}O_{74}S_{32}V_{10}$ |
| Formula weight                              | 14375.28                                              |
| Temperature/K                               | 99.9(3)                                               |
| Crystal system                              | monoclinic                                            |
| Space group                                 | $P2_1/n$                                              |
| $a/\text{\AA}$                              | 25.6844(3)                                            |
| $b/\text{\AA}$                              | 27.1429(2)                                            |
| $c/\text{\AA}$                              | 36.5460(4)                                            |
| $\alpha/^\circ$                             | 90                                                    |
| $\beta/^\circ$                              | 91.7718(9)                                            |
| $\gamma/^\circ$                             | 90                                                    |
| Volume/ $\text{\AA}^3$                      | 25465.9(5)                                            |
| Z                                           | 2                                                     |
| $\rho_{\text{calc}}/\text{g/cm}^3$          | 1.875                                                 |
| $\mu/\text{mm}^{-1}$                        | 18.328                                                |
| F(000)                                      | 14128.0                                               |
| Radiation                                   | Cu $K\alpha$ ( $\lambda = 1.54184$ )                  |
| Reflections collected                       | 145654                                                |
| Independent reflections                     | 44825[Rint = 0.0657, Rsigma = 0.0596]                 |
| Data/parameters                             | 44825/2756                                            |
| Goodness-of-fit on $F^2$                    | 1.029                                                 |
| Final R indexes [ $I \geq 2\sigma(I)$ ]     | $R_1 = 0.1448$ , $wR_2 = 0.3506$                      |
| Final R indexes [all data]                  | $R_1 = 0.1575$ , $wR_2 = 0.3593$                      |
| Largest diff. peak/hole/ $e\text{\AA}^{-3}$ | 3.77/-3.43                                            |

**Table S5:** Selected bond distances (Å) and bond angles (°) for **Ag50**.

| Ag50                  |           |                        |           |
|-----------------------|-----------|------------------------|-----------|
| Ag1—Ag2               | 2.923(11) | Ag16—S2                | 2.497(4)  |
| Ag1—Ag3               | 2.936(5)  | Ag16—S10               | 2.539(5)  |
| Ag1—Ag16 <sup>i</sup> | 3.210(3)  | Ag16—S16 <sup>i</sup>  | 2.737(8)  |
| Ag1—O10 <sup>i</sup>  | 2.555(11) | Ag17—Ag18              | 3.086(3)  |
| Ag1—S13               | 2.345(6)  | Ag17—Ag23 <sup>i</sup> | 2.927(2)  |
| Ag1—S16               | 2.413(6)  | Ag17—S2                | 2.443(4)  |
| Ag2—Ag3               | 2.915(16) | Ag17—S6                | 2.431(5)  |
| Ag2—Ag7               | 3.325(12) | Ag18—Ag19              | 2.866(3)  |
| Ag2—S11               | 2.678(14) | Ag18—O16               | 2.38(2)   |
| Ag2—S13               | 2.889(14) | Ag18—S4 <sup>i</sup>   | 2.568(5)  |
| Ag3—S1                | 2.348(16) | Ag18—S6                | 2.555(6)  |
| Ag3—S16               | 2.669(9)  | Ag18—S8                | 2.694(6)  |
| Ag4—Ag5               | 2.805(11) | Ag19—O15               | 2.24(2)   |
| Ag4—Ag20 <sup>i</sup> | 2.715(6)  | Ag19—S4 <sup>i</sup>   | 2.900(5)  |
| Ag4—S9 <sup>i</sup>   | 2.602(8)  | Ag19—S8                | 2.905(6)  |
| Ag5—Ag19              | 3.172(8)  | Ag19—S15               | 2.474(6)  |
| Ag5—Ag20 <sup>i</sup> | 3.026(6)  | Ag20—O13               | 2.474(11) |
| Ag5—S15               | 2.12(1)   | Ag20—S5                | 2.861(5)  |
| Ag6—O21               | 2.14(3)   | Ag20—S9                | 2.456(5)  |
| Ag6—S9 <sup>i</sup>   | 2.74(3)   | Ag20—S15 <sup>i</sup>  | 2.495(6)  |
| Ag6—S10 <sup>i</sup>  | 2.89(3)   | Ag21—Ag22              | 2.865(3)  |
| Ag6—S16               | 2.622(13) | Ag21—Ag23              | 3.323(2)  |
| Ag7—Ag8               | 2.858(4)  | Ag21—O20               | 2.390(18) |
| Ag7—O9 <sup>i</sup>   | 2.522(10) | Ag21—S4                | 2.552(5)  |
| Ag7—S1                | 2.584(12) | Ag21—S5                | 2.617(5)  |
| Ag7—S8                | 2.576(5)  | Ag21—S15 <sup>i</sup>  | 2.817(7)  |
| Ag7—S11               | 2.467(6)  | Ag22—Ag24              | 2.984(3)  |
| Ag8—Ag9               | 3.373(3)  | Ag22—O19               | 2.413(18) |
| Ag8—Ag18              | 2.949(3)  | Ag22—S5                | 2.484(5)  |
| Ag8—O5 <sup>i</sup>   | 2.547(10) | Ag22—S7                | 2.434(6)  |
| Ag8—S3                | 2.382(5)  | Ag23—O7                | 2.34(1)   |
| Ag8—S8                | 2.435(5)  | Ag23—S2 <sup>i</sup>   | 2.658(5)  |
| Ag9—Ag10              | 3.006(3)  | Ag23—S4                | 2.456(5)  |
| Ag9—Ag11              | 3.148(3)  | Ag23—S7                | 2.687(5)  |
| Ag9—S3                | 2.564(5)  | Ag24—Ag25              | 3.051(2)  |
| Ag9—S11               | 2.548(6)  | Ag24—O24               | 2.300(18) |
| Ag9—S14               | 2.665(6)  | Ag24—S7                | 2.489(5)  |
| Ag10—Ag24             | 2.954(3)  | Ag24—S14               | 2.455(7)  |
| Ag10—Ag25             | 3.025(2)  | Ag25—O6                | 2.444(11) |
| Ag10—O23              | 2.267(19) | Ag25—S2 <sup>i</sup>   | 2.714(4)  |

|                                       |            |                           |            |
|---------------------------------------|------------|---------------------------|------------|
| Ag10—S11                              | 2.773(6)   | Ag25—S7                   | 2.533(5)   |
| Ag10—S13                              | 2.683(6)   | Ag25—S13                  | 2.447(6)   |
| Ag10—S14                              | 2.763(7)   | Ag13—S12                  | 2.306(9)   |
| Ag11—Ag12                             | 3.119(2)   | Ag14—Ag15                 | 3.261(3)   |
| Ag11—Ag14                             | 2.985(3)   | Ag14—O17                  | 2.43(2)    |
| Ag11—Ag15                             | 3.233(3)   | Ag14—S10                  | 2.430(6)   |
| Ag11—O14                              | 2.463(10)  | Ag14—S12                  | 2.518(6)   |
| Ag11—S3                               | 2.461(5)   | Ag15—Ag16                 | 3.322(3)   |
| Ag11—S12                              | 2.428(6)   | Ag15—Ag17                 | 2.964(3)   |
| Ag12—Ag22                             | 3.036(3)   | Ag15—S3                   | 2.544(5)   |
| Ag12—Ag24                             | 3.072(2)   | Ag15—S6                   | 2.661(6)   |
| Ag12—S5                               | 2.524(5)   | Ag15—S10                  | 2.422(7)   |
| Ag12—S12                              | 2.787(7)   | Ag16—Ag17                 | 3.228(3)   |
| Ag12—S14                              | 2.556(6)   | Ag16—O11                  | 2.552(10)  |
| Ag12—O14                              | 2.79(1)    | Ag13—O25                  | 2.43(3)    |
| Ag13—S9                               | 2.547(9)   | Ag13—Ag14                 | 3.207(8)   |
| S13—Ag1—O10 <sup>i</sup>              | 78.4(3)    | O6—Ag25—S13               | 118.5(3)   |
| S13—Ag1—S16                           | 157.73(19) | S7—Ag25—S2 <sup>i</sup>   | 94.13(15)  |
| S16—Ag1—O10 <sup>i</sup>              | 123.9(3)   | S13—Ag25—S2 <sup>i</sup>  | 111.29(18) |
| S11—Ag2—S13                           | 89.5(4)    | S13—Ag25—S7               | 140.65(18) |
| S1—Ag3—S16                            | 131.4(4)   | S9—Ag20—S15 <sup>i</sup>  | 143.4(2)   |
| O21—Ag6—S9 <sup>i</sup>               | 103.3(9)   | S15 <sup>i</sup> —Ag20—S5 | 99.5(2)    |
| O21—Ag6—S10 <sup>i</sup>              | 99.1(15)   | O20—Ag21—S4               | 102.7(6)   |
| O21—Ag6—S16                           | 114.7(9)   | O20—Ag21—S5               | 102.7(7)   |
| S9 <sup>i</sup> —Ag6—S10 <sup>i</sup> | 137.7(3)   | O20—Ag21—S15 <sup>i</sup> | 102.0(7)   |
| S16—Ag6—S9 <sup>i</sup>               | 116.8(13)  | S4—Ag21—S5                | 143.90(16) |
| S16—Ag6—S10 <sup>i</sup>              | 84.4(5)    | S4—Ag21—S15 <sup>i</sup>  | 101.52(17) |
| O9 <sup>i</sup> —Ag7—S1               | 87.1(4)    | S5—Ag21—S15 <sup>i</sup>  | 97.81(17)  |
| O9 <sup>i</sup> —Ag7—S8               | 95.6(3)    | O19—Ag22—S5               | 104.1(6)   |
| S8—Ag7—S1                             | 109.6(4)   | O19—Ag22—S7               | 113.4(6)   |
| S11—Ag7—O9 <sup>i</sup>               | 107.5(3)   | S7—Ag22—S5                | 138.74(17) |
| S11—Ag7—S1                            | 110.6(4)   | O7—Ag23—S2 <sup>i</sup>   | 101.6(3)   |
| S11—Ag7—S8                            | 134.2(2)   | O7—Ag23—S4                | 105.8(3)   |
| S3—Ag8—O5 <sup>i</sup>                | 94.5(3)    | O7—Ag23—S7                | 106.1(3)   |
| S3—Ag8—S8                             | 149.86(19) | S2 <sup>i</sup> —Ag23—S7  | 91.96(15)  |
| S8—Ag8—O5 <sup>i</sup>                | 115.5(3)   | S4—Ag23—S2 <sup>i</sup>   | 130.14(15) |
| S3—Ag9—S14                            | 110.4(2)   | S4—Ag23—S7                | 118.32(17) |
| S11—Ag9—S3                            | 119.78(19) | O24—Ag24—S7               | 108.1(6)   |
| S11—Ag9—S14                           | 111.0(2)   | O24—Ag24—S14              | 107.8(7)   |
| O23—Ag10—S11                          | 119.7(7)   | S14—Ag24—S7               | 141.07(16) |
| O23—Ag10—S13                          | 99.3(6)    | O6—Ag25—S2 <sup>i</sup>   | 96.4(3)    |
| O23—Ag10—S14                          | 100.3(6)   | O6—Ag25—S7                | 86.2(3)    |
| S13—Ag10—S11                          | 91.85(2)   | S2—Ag16—O11               | 104.8(3)   |

|                           |            |                           |            |
|---------------------------|------------|---------------------------|------------|
| S13—Ag10—S14              | 146.28(18) | S2—Ag16—S10               | 136.56(17) |
| S14—Ag10—S11              | 101.81(18) | S2—Ag16—S16 <sup>i</sup>  | 118.96(17) |
| O14—Ag11—S3               | 110.4(3)   | S10—Ag16—O11              | 113.7(3)   |
| S12—Ag11—O14              | 98.8(3)    | S10—Ag16—S16 <sup>i</sup> | 89.27(19)  |
| S12—Ag11—S3               | 150.63(18) | S6—Ag17—S2                | 155.45(17) |
| S5—Ag12—S12               | 102.05(18) | O16—Ag18—S4 <sup>i</sup>  | 98.3(7)    |
| S5—Ag12—S14               | 158.5(2)   | O16—Ag18—S6               | 100.0(7)   |
| S14—Ag12—S12              | 98.9(2)    | O16—Ag18—S8               | 97.4(7)    |
| O25—Ag13—S9               | 106.5(10)  | S4 <sup>i</sup> —Ag18—S8  | 118.26(17) |
| S12—Ag13—O25              | 111.9(10)  | S6—Ag18—S4 <sup>i</sup>   | 122.66(17) |
| S12—Ag13—S9               | 141.2(3)   | S6—Ag18—S8                | 112.49(16) |
| O17—Ag14—S12              | 101.6(6)   | O15—Ag19—S4 <sup>i</sup>  | 105.4(7)   |
| S10—Ag14—O17              | 113.9(5)   | O15—Ag19—S8               | 97.5(8)    |
| S10—Ag14—S12              | 141.76(18) | O15—Ag19—S15              | 139.8(8)   |
| S3—Ag15—S6                | 86.11(16)  | S4 <sup>i</sup> —Ag19—S8  | 102.18(15) |
| S10—Ag15—S3               | 141.99(19) | S15—Ag19—S4 <sup>i</sup>  | 101.2(2)   |
| S10—Ag15—S6               | 131.90(18) | S15—Ag19—S8               | 105.7(2)   |
| O11—Ag16—S16 <sup>i</sup> | 77.4(3)    | O13—Ag20—S5               | 80.2(3)    |
| S9—Ag20—S5                | 104.82(18) | O13—Ag20—S15 <sup>i</sup> | 112.8(3)   |
| S9—Ag20—O13               | 98.3(3)    | O13—Ag20—S15 <sup>i</sup> | 112.8(3)   |
|                           |            |                           |            |

## Reference:

1. Tang, K. L.; Xie, X. J.; Zhao, L.; Zhang, Y. H.; Jin, X. L. Synthesis and crystal structure of  $\{[\text{HNEt}_3]_{2n}[\text{Ag}_8\text{Ag}_{4/2}(\text{SC}_6\text{H}_4\text{tBu-4})_{12}]_n \cdot n\text{C}_2\text{H}_5\text{OH}\}$  and its reaction product with  $\text{CS}_2$ . *Eur. J. Inorg. Chem.* **2004**, 2004, 78-85.
2. Iki, N.; Kabuto, C.; Fukushima, T.; Kumagai, H.; Takeya, H.; Miyanari, S.; Miyashi, T.; Miyano, S. Synthesis of *p*-*tert*-butylthiacalix[4]arene and its inclusion property. *Tetrahedron* **2000**, 56, 1437-1443.
3. Rigaku Oxford Diffraction. *CrysAlis<sup>Pro</sup> software system, version 1.171.40.84a*, Rigaku Corporation: Oxford, UK, **2018**.
4. Chaki, N. K.; Mandal, S.; Reber, A. C.; Qian, M.; Saavedra, H. M.; Weiss, P. S.; Khanna, S. N.; Sen, A. Controlling band gap energies in cluster-assembled ionic solids through internal electric fields. *ACS Nano* **2010**, 4, 5813-5818.
5. Sheng, K.; Wang, R.; Tang, X. D.; Jagodič, M.; Jagličič, Z.; Pang, L. X.; Dou, J. M.; Gao, Z. Y.; Feng, H. Y.; Tung, C. H.; Sun, D. A carbonate-templated decanuclear Mn nanocage with two different silsesquioxane ligands. *Inorg. Chem.* **2021**, 60, 14866-14871.
6. Clark, R. C.; Reid, J. S. The analytical calculation of absorption in multifaceted crystals. *Acta Crystallogr.* **1995**, A51, 887-897.
7. Sheldrick, G. M. *SHELXT*-Integrated space-group and crystal-structure determination. *Acta Crystallogr.* **2015**, A71, 3-8.
8. Sheldrick, G. M. Crystal structure refinement with SHELXL. *Acta Crystallogr.* **2015**, C71, 3-8.
9. Dolomanov, O. V.; Bourhis, L. J.; Gildea, R. J.; Howard, J. A. K.; Puschmann, H. OLEX2: a complete structure solution, refinement and analysis program. *J. Appl. Crystallogr.* **2009**, 42, 339-341.
10. Spek, A. L. Structure validation in chemical crystallography. *Acta Crystallogr.* **2009**, D65, 148-155.
11. Voss, N. R.; Gerstein, M. 3V: cavity, channel and cleft volume calculator and extractor. *Nucleic Acids Res.* **2010**, 38, W555-W562.
12. Su, Y. M.; Liu, W.; Wang, Z.; Wang, S. A.; Li, Y. A.; Yu, F.; Zhao, Q. Q.; Wang, X. P.; Tung, C. H.; Sun, D. Benzoate-induced high-nuclearity silver thiolate clusters. *Chem. Eur. J.* **2018**, 24, 4967-4972.

13. Wang, Z.; Su, H. F.; Tung, C. H.; Sun, D.; Zheng, L. S. Deciphering synergetic core-shell transformation from [Mo<sub>6</sub>O<sub>22</sub>@Ag<sub>44</sub>] to [Mo<sub>8</sub>O<sub>28</sub>@Ag<sub>50</sub>]. *Nat. Commun.* **2018**, 4407.
14. Li, X. Y.; Wang, Z.; Su, H. F.; Feng, S.; Kurmoo, M.; Tung, C. H.; Sun, D.; Zheng, L. S. Anion-templated nanosized silver clusters protected by mixed thiolate and diphosphine. *Nanoscale* **2017**, 9, 3601-3608.
15. Li, X. Y.; Tan, Y. Z.; Yu, K.; Wang, X. P.; Zhao, Y. Q.; Sun, D.; Zheng, L. S. Atom-precise polyoxometalate-Ag<sub>2</sub>S core-shell nanoparticles. *Chem. Asian. J.* **2015**, 10, 1295-1298.
16. Qiao, J.; Shi, K.; Wang, Q. M. A giant silver alkynyl cage with sixty silver(I) ions clustered around polyoxometalate templates. *Angew. Chem. Int. Ed.* **2010**, 49, 1765-1767.
17. Liu, J. W.; Feng, L.; Su, H. F.; Wang, Z.; Zhao, Q. Q.; Wang, X. P.; Tung, C. H.; Sun, D.; Zheng, L. S. Anisotropic assembly of Ag<sub>52</sub> and Ag<sub>76</sub> nanoclusters. *J. Am. Chem. Soc.* **2018**, 140, 1600-1603.
18. Wang, Z.; Su, H. F.; Kurmoo, M.; Tung, C. H.; Sun, D.; Zheng, L. S. Trapping an octahedral Ag<sub>6</sub> kernel in a seven-fold symmetric Ag<sub>56</sub> nanowheel. *Nat. Commun.* **2018**, 9, 2094.
19. Wang, Z.; Zhuo, H. Y.; Hu, A. Y.; Su, H. F.; Zhao, Q. Q.; Wang, X. P.; Tung, C. H.; Sun, D. Self-assembly of a novel Ag<sub>48</sub> cluster encapsulating an unprecedented [Mo<sub>8</sub>O<sub>28</sub>]<sup>8-</sup> anion template. *Isr. J. Chem.* **2019**, 59, 280-285.
20. Wang, Z.; Su, H. F.; Wang, X. P.; Zhao, Q. Q.; Tung, C. H.; Sun, D.; Zheng, L. S. Johnson solids: anion-templated silver thiolate clusters capped by sulfonate. *Chem. Eur. J.* **2018**, 24, 1640-1650.
21. Su, Y. M.; Wang, Z.; Zhuang, G. L.; Zhao, Q. Q.; Wang, X. P.; Tung, C. H.; Sun, D. Unusual fcc-structured Ag<sub>10</sub> kernels trapped in Ag<sub>70</sub> nanoclusters. *Chem. Sci.* **2019**, 10, 564-568.
22. Huang, R. W.; Xu, Q. Q.; Lu, H. L.; Guo, X. K.; Zang, S. Q.; Gao, G. G.; Tang, M. S.; Mak, T. C. W. Self-assembly of an unprecedented polyoxomolybdate anion [Mo<sub>20</sub>O<sub>66</sub>]<sup>12-</sup> in a giant peanut-like 62-core silver-thiolate nanocluster. *Nanoscale* **2015**, 7, 7151-7154.
23. Wang, J. Y.; Liu, K. G.; Guan, Z. J.; Nan, Z. A.; Lin, Y. M.; Wang, Q. M. [Mn<sup>III</sup>Mn<sup>IV</sup><sub>2</sub>Mo<sub>14</sub>O<sub>56</sub>]<sup>17-</sup>: a mixed-valence meso-polyoxometalate anion encapsulated by a 64-nuclearity silver cluster. *Inorg. Chem.* **2016**, 55, 6833-6835.
24. Gao, G. G.; Cheng, P. S.; Mak, T. C. W. Acid-induced surface functionalization of polyoxometalate by enclosure in a polyhedral silver-alkynyl cage. *J. Am. Chem. Soc.* **2009**, 131,

18257-18259.

25. Wang, Z.; Sun, Y. M.; Qu, Q. P.; Liang, Y. X.; Wang, X. P.; Liu, Q. Y.; Kurmoo, M.; Su, H. F.; Tung, C. H.; Sun, D. Enclosing classical polyoxometallates in silver nanoclusters. *Nanoscale* **2019**, *11*, 10927-10931.
26. Gao, J. P.; Qi, Z. K.; Zhang, F. Q.; Zhang, X. M. *In situ* insertion of copper to form heteroanionic  $D_{3h}$ -symmetric  $[\text{Cu}_3\text{Mo}_8\text{O}_{32}]^{10-}$  for a templated  $\text{Ag}_{55}$  nanocluster. *Nanoscale* **2022**, *14*, 4469-4473.
27. Zhang, S. S.; Chen, J. Y.; Li, K.; Yuan, J. D.; Su, H. F.; Wang, Z.; Kurmoo, M.; Li, Y. Z.; Gao, Z. Y.; Tung, C. H.; Sun, D.; Zheng, L. S. Janus cluster: asymmetric coverage of a  $\text{Ag}_{43}$  cluster on the symmetric preyssler  $\text{P}_5\text{W}_{30}$  polyoxometalate. *Chem. Mater.* **2021**, *33*, 9708-9714.
28. Yan, B. J.; Du, X. S.; Huang, R. W.; Yang, J. S.; Wang, Z. Y.; Zang, S. Q.; Mak, T. C. W. Self-assembly of a stable silver thiolate nanocluster encapsulating a lacunary kegglin phosphotungstate anion. *Inorg. Chem.* **2018**, *57*, 4828-4832.
29. Jiang, Z. G.; Shi, K.; Lin, Y. M.; Wang, Q. M.  $[\text{Ag}_{70}(\text{PW}_9\text{O}_{34})_2(\text{tBuC}\equiv\text{C})_{44}(\text{H}_2\text{O})_2]^{8+}$ : ionothermal synthesis of a silver cluster encapsulating lacunary polyoxometalate ions. *Chem. Commun.* **2014**, *50*, 2353-2355.
30. Liu, J. W.; Su, H. F.; Wang, Z.; Li, Y. A.; Zhao, Q. Q.; Wang, X. P.; Tung, C. H.; Sun, D.; Zheng, L. S. A giant 90-nucleus silver cluster templated by hetero-anions. *Chem. Commun.* **2018**, *54*, 4461-4464.
31. Zhou, K.; Qin, C.; Li, H. B.; Yan, L. K.; Wang, X. L.; Shan, G. G.; Su, Z. M.; Xu, C.; Wang, X. L. Assembly of a luminescent core-shell nanocluster featuring a  $\text{Ag}_{34}\text{S}_{26}$  shell and a  $\text{W}_6\text{O}_{21}^{6-}$  polyoxoanion core. *Chem. Commun.* **2012**, *48*, 5844-5846.
32. Wang, Z.; Sun, H. T.; Kurmoo, M.; Liu, Q. Y.; Zhuang, G. L.; Zhao, Q. Q.; Wang, X. P.; Tung, C. H.; Sun, D. Carboxylic acid stimulated silver shell isomerism in a triple core-shell  $\text{Ag}_{84}$  nanocluster. *Chem. Sci.* **2019**, *10*, 4862-4867.
33. Li, Y. Y.; Gao, F.; Beves, J. E.; Li, Y. Z.; Zuo, J. L. A giant metallo-supramolecular cage encapsulating a single-molecule magnet. *Chem. Commun.* **2013**, *49*, 3658-3660.
34. Song, C. Y.; Chai, D. F.; Zhang, R. R.; Liu, H.; Qiu, Y. F.; Guo, H. D.; Gao, G. G. A silver-alkynyl cluster encapsulating a fluorescent polyoxometalate core: enhanced emission and fluorescence modulation. *Dalton. Trans.* **2015**, *44*, 3997-4002.



35. Zhang, S. S.; Su, H. F.; Wang, Z.; Wang, X. P.; Chen, W. X.; Zhao, Q. Q.; Tung, C. H.; Sun, D.; Zheng, L. S. Elimination-fusion self-assembly of a nanometer-scale 72-Nucleus silver cluster caging a pair of  $[\text{EuW}_{10}\text{O}_{36}]^{9-}$  polyoxometalates. *Chem. Eur. J.* **2018**, *24*, 1998-2003.
36. Liu, K. G.; Liu, X. Y.; Guan, Z. J.; Shi, K.; Lin, Y. M.; Wang, Q. M. The transformation of polyoxometalates in the formation of intercluster compound  $[\text{Ag}_{41}(\alpha\text{-SiW}_{10}\text{O}_{37})(\text{tBuC}\equiv\text{C})_{27}(\text{CH}_3\text{CN})_3][\beta\text{-SiW}_{12}\text{O}_{40}]$ . *Chem. Commun.* **2016**, *52*, 3801-3804.
37. Duan, G. X.; Xie, Y. P.; Jin, J. L.; Bao, L. P.; Lu, X.; Mak, T. C. W. High-nuclearity heterometallic *tert*-butylethyne clusters assembled with *tert*-butylphosphonate. *Chem. Eur. J.* **2018**, *24*, 6762-6768.
38. Yu, J. Q.; Xue, C. H.; Zhou, K.; Fang, Y.; Ji, J. Y.; Chen, B. K.; Bi, Y. F. Trapping a  $[\text{W}_{10}\text{O}_{32}]^{6-}$  decatungstate anion in an  $\text{Ag}_{44}$  nanowheel. *Chem. Asian J.* **2022**, *17*, e202200072.
39. Gruber, F.; Jansen, M.  $\{[\text{Ag}_{42}(\text{CO}_3)(\text{C}\equiv\text{CtBu})_{27}(\text{CH}_3\text{CN})_2][\text{CoW}_{12}\text{O}_{40}]_2\}[\text{BF}_4]$ : an intercluster sandwich compound. *Angew. Chem. Int. Ed.* **2010**, *49*, 4924-4926.
40. Wang, Z.; Zhu, Y. J.; Li, Y. Z.; Zhuang, G. L.; Song, K. P.; Gao, Z. Y.; Dou, J. M.; Kurmoo, M.; Tung, C. H.; Sun, D. Nuclearity enlargement from  $[\text{PW}_9\text{O}_{34}@\text{Ag}_{51}]$  to  $[(\text{PW}_9\text{O}_{34})_2@\text{Ag}_{72}]$  and 2D and 3D network formation driven by bipyridines. *Nat. Commun.* **2022**, *13*, 1802.
41. Kurasawa, M.; Arisaka, F.; Ozeki, T. Asymmetrically fused polyoxometalate-silver alkyne composite cluster. *Inorg. Chem.* **2015**, *54*, 1650-1654.
42. Tamari, S.; Ono, K.; Hashimoto, M.; Ozeki, T. Control over the preference for binding sites of polyoxometalates to silver ethynide clusters by surface charge modification. *Dalton. Trans.* **2015**, *44*, 19056-19058.
43. Xie, Y. P.; Mak, T. C. W. High-nuclearity silver ethynide clusters assembled with phosphonate and metavanadate precursors. *Angew. Chem. Int. Ed.* **2012**, *51*, 8783-8786.
44. Xie, Y. P.; Mak, T. C. W. Silver(I)-ethynide clusters constructed with phosphonate-functionalized polyoxovanadates. *J. Am. Chem. Soc.* **2011**, *133*, 3760-3763.
45. Liu, H.; Song, C. Y.; Huang, R. W.; Zhang, Y.; Xu, H.; Li, M. J.; Zang, S. Q.; Gao, G. G. Acid-base-triggered structural transformation of a polyoxometalate core inside a dodecahedrane-like silver thiolate shell. *Angew. Chem. Int. Ed.* **2016**, *55*, 3699-3703.
46. Xie, Y. P.; Mak, T. C. W. A pyrovanadate-templated silver(I)-ethynide cluster circumscribed by macrocyclic polyoxovanadate(V). *Chem. Commun.* **2012**, *48*, 1123-1125.

47. Jin, J. L.; Shen, Y. L.; Xie, Y. P.; Lu, X. Silver ethynide clusters constructed with fluorinated  $\beta$ -diketonate ligands. *CrystEngComm* **2018**, 20, 2036-2042.
